# Supplementary material for: Mediator complex interaction partners organize the transcriptional network that defines neural stem cells
Source: PubMed Central journal article supplement (PMC6573065; doi:10.1038/s41467-019-10502-8), 2019-06-17
Supplement: 41467_2019_10502_MOESM1_ESM.pdf [file 41467_2019_10502_MOESM1_ESM.pdf]

## Supplementary Information

**Mediator complex interaction partners organize the transcriptional network that defines neural stem cells**

Raymond A. Poot, et al.

## **Table of contents**

### **Supplementary Figures**

Supplementary Figure 1: Mediator complex and its interactors at promoters. (PDF)

Supplementary Figure 2: Tcf4 and its interactors at super enhancers and broad H3K4me3 promoters. (PDF)

Supplementary Figure 3: Human neural stem cells stain positive for Nestin and Sox2 (PDF)

Supplementary Figure 4: Uncropped gel of Figure 1b and westerns of Figure 2a,b. (PDF)

### **Supplementary Data**

Supplementary Data 1: Interacting proteins of the Mediator complex, as identified by mass spectrometry analysis of FLAG-Med15 purifications. (xlsx)

Supplementary Data 2. Overlapping interacting proteins of the Mediator complex in Med12 immunoprecipitation, as identified by mass spectrometry analyses. (xlsx)

Supplementary Data 3: Super enhancers in NSCs and nearest active genes. (xlsx)

Supplementary Data 4: Gene Ontology terms of active genes in NSCs nearest to a super enhancer (SE) and/or having a broad H3K4me3 promoter. (xlsx)

Supplementary Data 5: Genes nearest to an SE and with broad H3K4me3 promoters in NSCs. (xlsx)

Supplementary Table 1: Data sets used in the study

Supplementary Table 2: Primers used in the study.

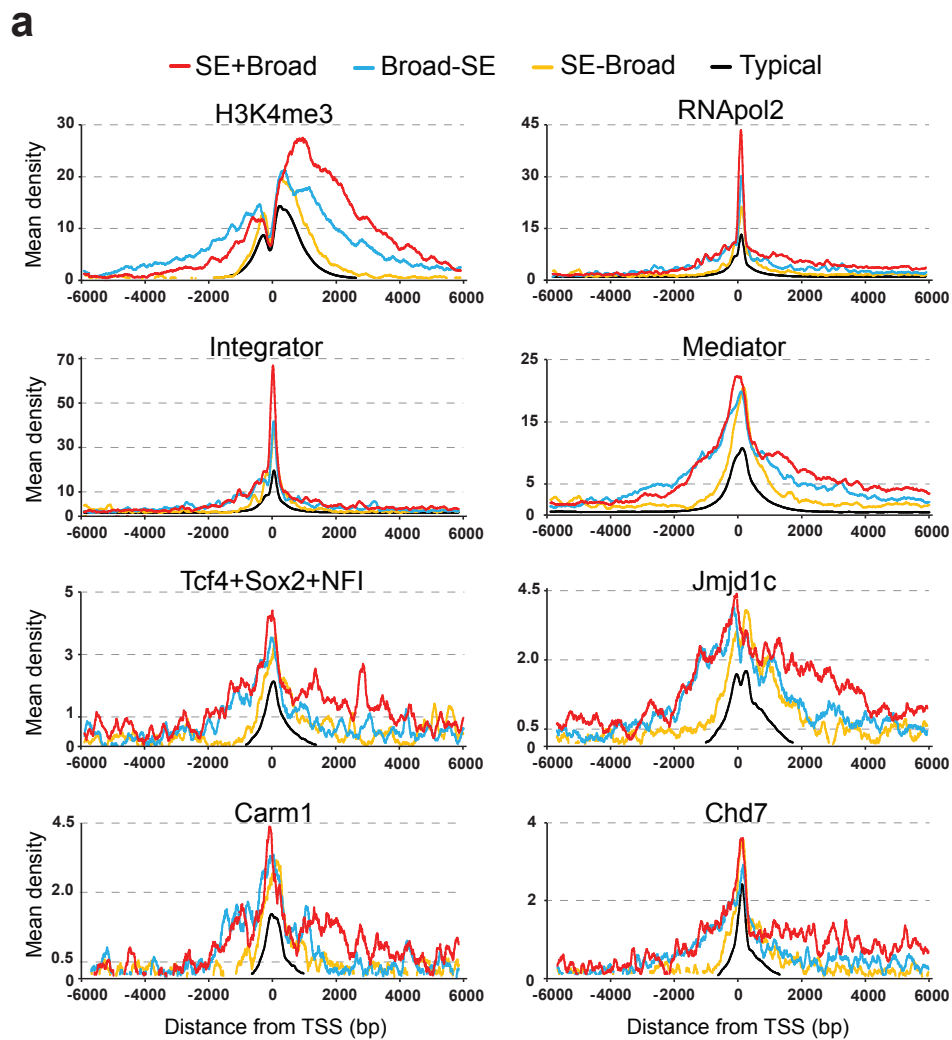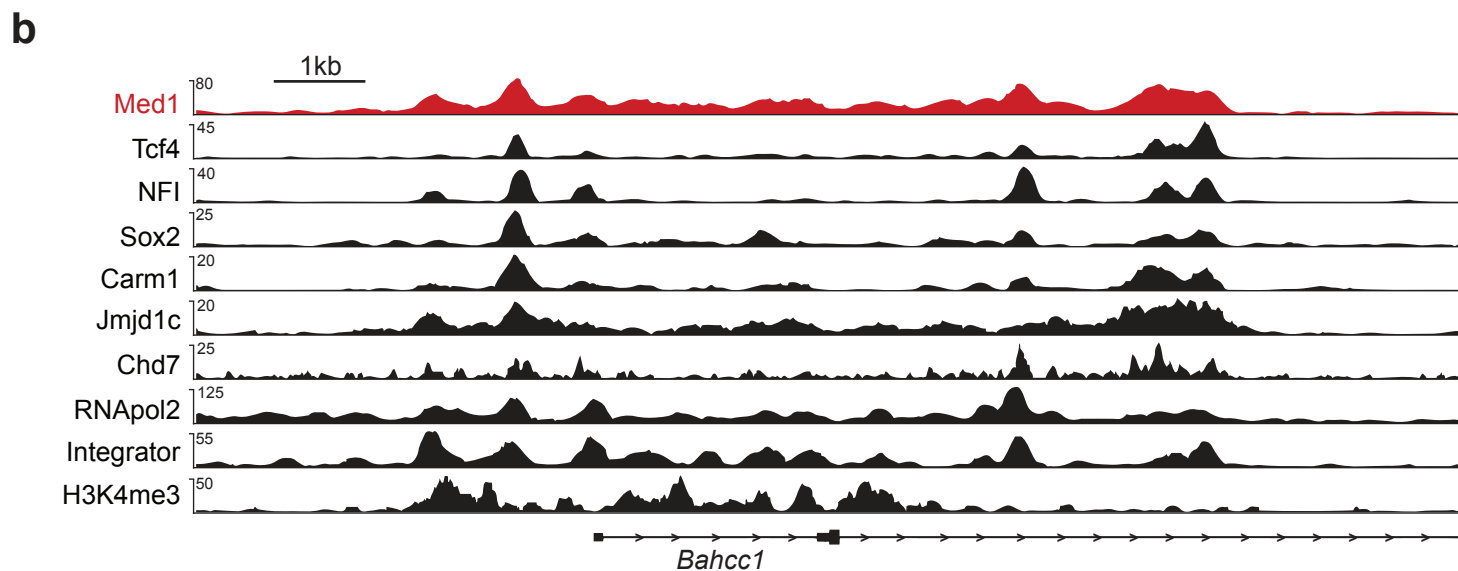

**Supplementary Fig. 1** Mediator complex and its interactors at promoters.

(a) ChIP-seq density plots around top 100 promoters of Broad+SE genes, top 100 Broad-SE genes, top 100 SE-Broad genes and all typical genes for the indicated factors and histone modifications. Mean ChIP-seq density (y-axis) and distance to TSS (x-axis) are shown.

(b) Overlap of binding sites of Med1 with binding sites of Mediator interactors at the *Bahcc1* broad H3K4me3 promoter area NSCs. ChIP-seq tracks for the indicated proteins and histone modifications at the *Hes1* gene are shown. Range of reads per million per base pair is indicated on the y-axis. Scale bar is indicated.

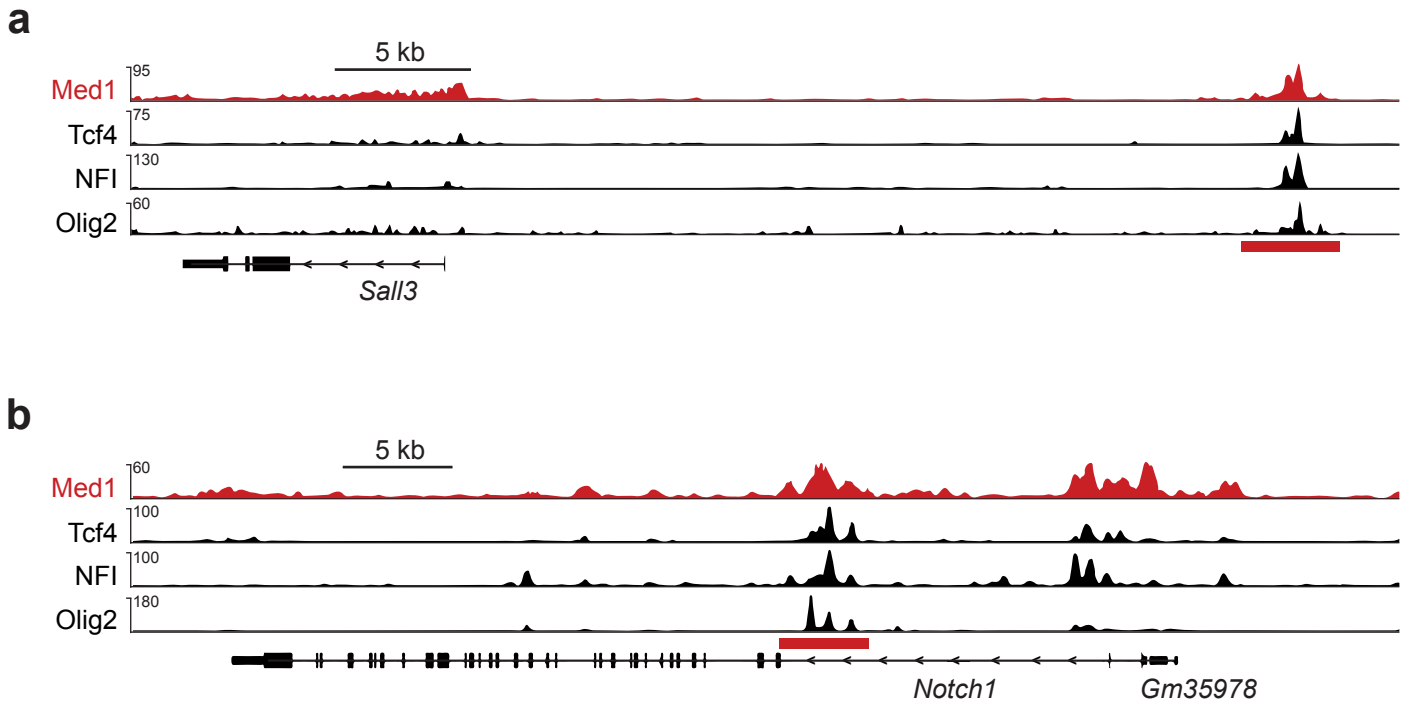

**Supplementary Fig. 2** Tcf4 and its interactors at super enhancers and broad H3k4me3 promoters.

(a) Overlap of binding sites of Tcf4 and Med1 with binding sites of Tcf4-interactors Olig2 and NFI at the *Sall3* locus in NSCs. ChIP-seq tracks for the indicated proteins at the *Sall3* gene are shown. The *Sall3* SE is indicated with a red bar. Range of reads per million per base pair is indicated on the y-axis. Scale bar is indicated.

(b) Overlap of binding sites of Tcf4 and Med1 with binding sites of Tcf4-interactors Olig2 and NFI at the *Notch1* locus in NSCs. ChIP-seq tracks for the indicated proteins at the *Notch1* gene are shown. The *Notch1* SE is indicated with a red bar. Range of reads per million per base pair is indicated on the y-axis. Scale bar is indicated.

**a**

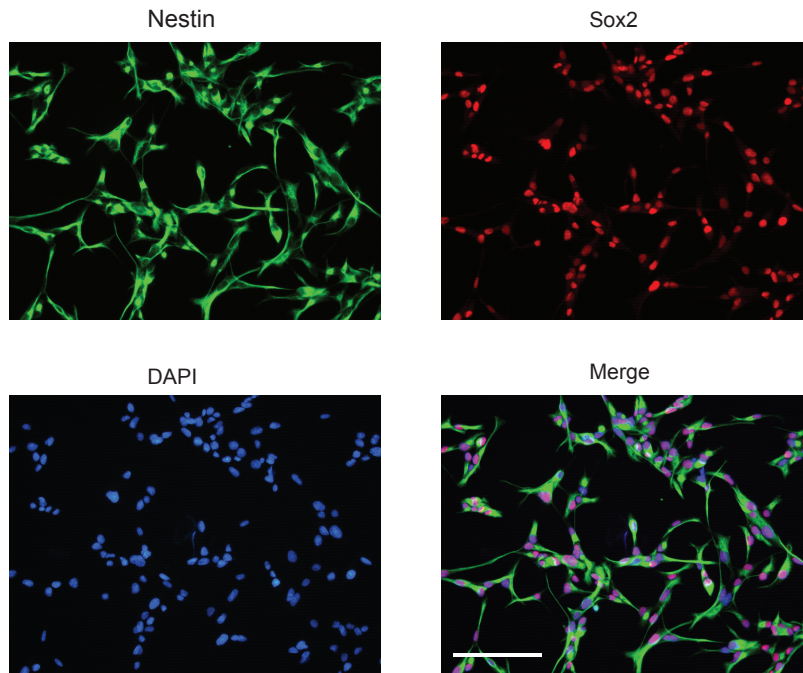

**b**

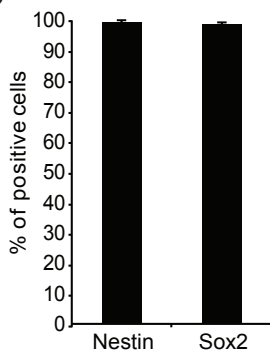

**Supplementary Fig. 3** Human neural stem cells stain positive for Sox2 and Nestin.

(a) Staining of human neural stem cells with Nestin antibodies (left-upper panel), Sox2 antibodies (right-upper panel), DAPI (left-lower panel) and the merge of all stainings (right-lower panel). Bar indicates 100  $\mu$ m.

(b) Percentage of human neural stem cells that stain positive for Nestin or Sox2. Percentage of all cells that stain positive for Nestin or Sox2 is indicated. S.e.m. of 6 technical replicate counts of 200 cells each on separate coverslips (1200 cells counted in total) is indicated.

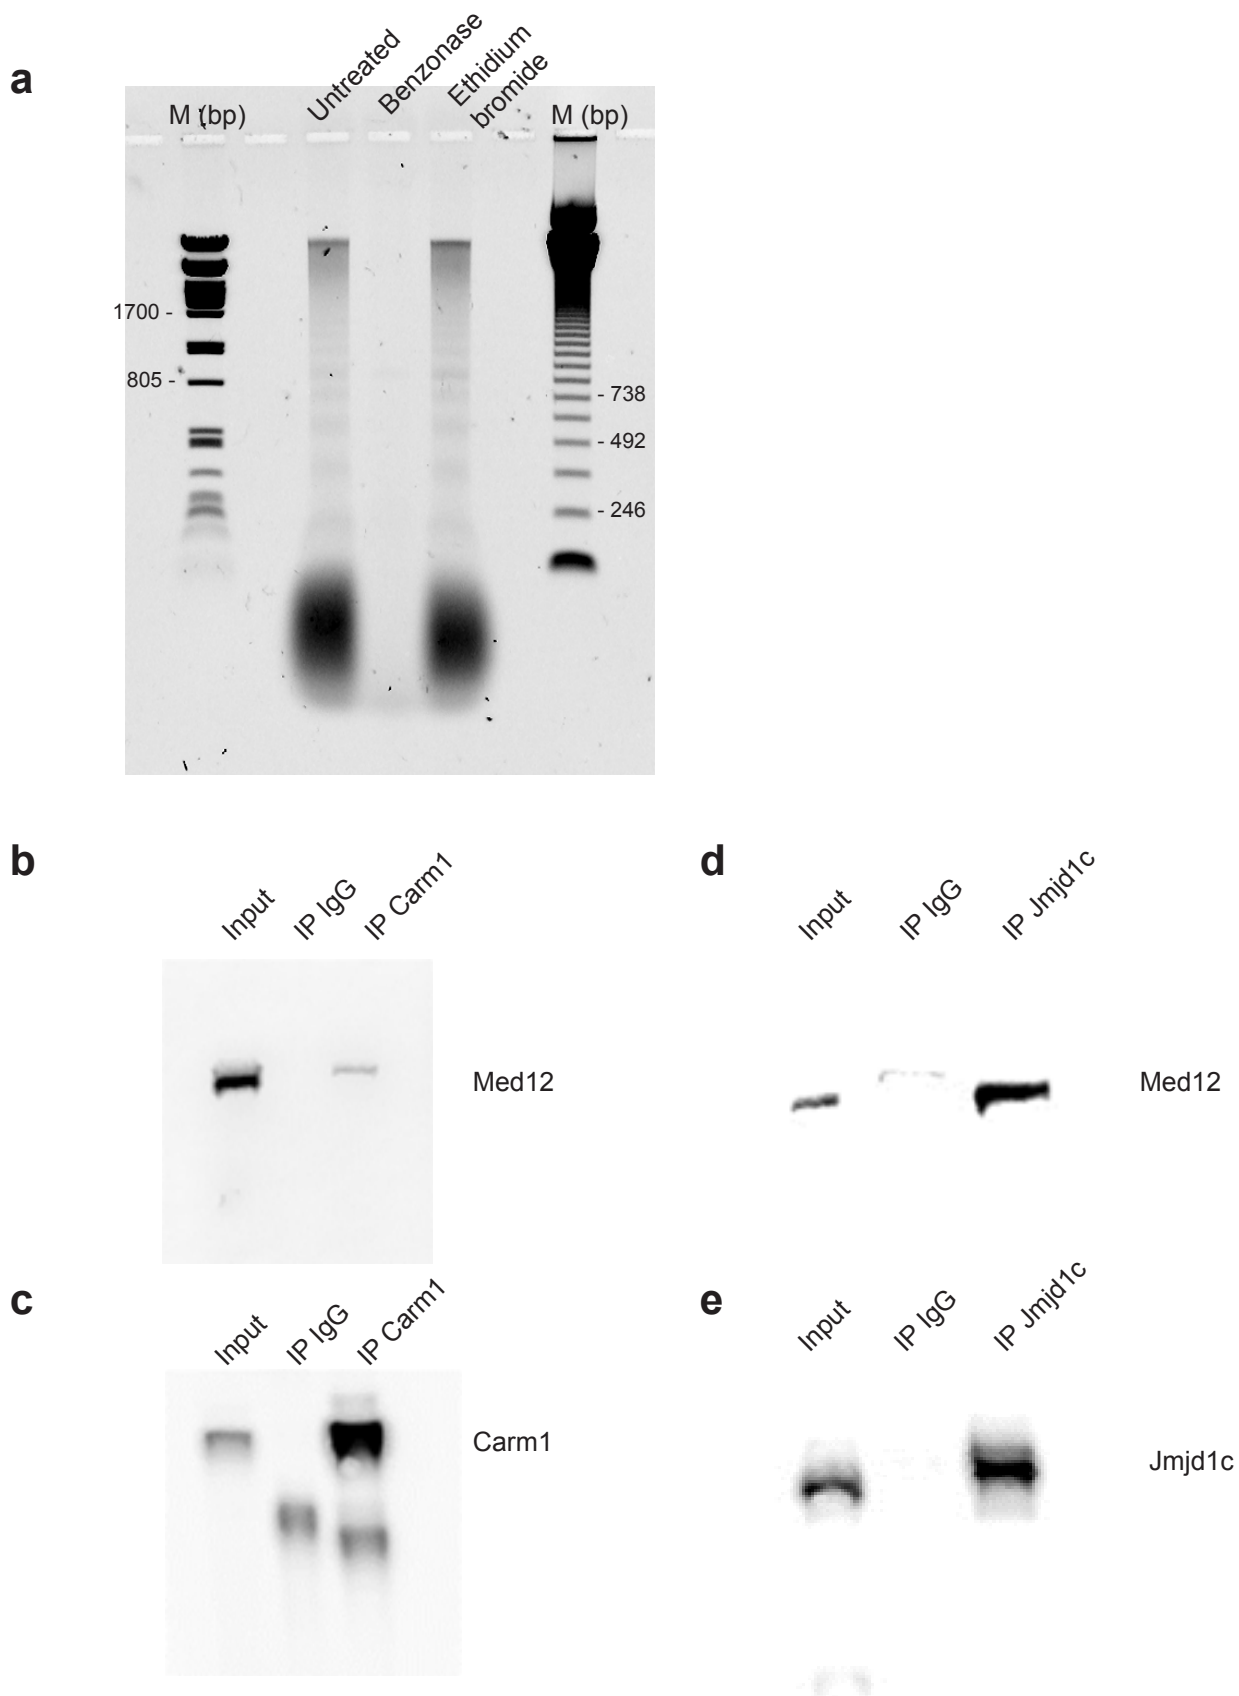

**Supplementary Fig. 4** Uncropped gel and westerns.

(a) Uncropped DNA agarose gel of Figure 1b. Samples and DNA molecular weight markers are indicated.

(b-e) Uncropped western blot scans of Figures 2a and 2b. Samples are indicated on the top of the western panels, antibodies are indicated to the right of the corresponding westerns.

**Supplementary Table 1.** Data sets used in the study.

| <b>ChIP-seq</b>      |                                    |
|----------------------|------------------------------------|
| Med1                 | GSM2928425                         |
| Jmjd1c               | GSM2928426                         |
| Carm1                | GSM2928427                         |
| IgG                  | GSM2928428                         |
| mNSCs Input          | GSM1187180                         |
| Tcf4                 | GSM1820990                         |
| Sox2                 | ERR414096                          |
| NFI                  | ERR414099                          |
| Olig2                | GSM1820994                         |
| Ints11               | ERR1173522                         |
| RNA pol II           | ERR1173526                         |
| Ep300                | ERR216112                          |
| H3K27ac              | ERR216108                          |
| H3K4me3              | SRR006888_SRR006889                |
| Cbx8                 | GSM2393587                         |
| Ctcf                 | GSM883647                          |
|                      |                                    |
| <b>RNA-seq</b>       |                                    |
| wild-type NSCs       | GSM1861892, GSM1861893, GSM1861894 |
| scrambled shRNA NSCs | GSM1861886, GSM1861887, GSM1861888 |
| Tcf4 knock down NSCs | GSM1861889, GSM1861890, GSM1861891 |

**Supplementary Table 2.** Primers used in the study.

| <b>Gene name or region</b> | <b>Use in qPCR</b> | <b>Sequence Fw</b>                      | <b>Sequence Rv</b>                      |
|----------------------------|--------------------|-----------------------------------------|-----------------------------------------|
| B-Actin                    | mRNA               | 5'- TCT CCT TCT GCA TCC TGT CAG CAA -3' | 5'- TCT TGG GTA TGG AAT CCT GTG GCA -3' |
| Tcf4                       | mRNA               | 5'- AGT CTG CAA CTT CCC CTG AC -3'      | 5'- GTC GTC GGA TTT GAT CTC AG -3'      |
| Sox2                       | mRNA               | 5'- AAA CAT GGC AAT CAA ATG TC -3'      | 5'- TTG CCA GTA CTT GCT CTC AT -3'      |
| Amylase                    | ChIP               | 5'- CTC CTT GTA CGG GTT GGT -3'         | 5'- AAT GAT GTG CAC AGC TGA A -3'       |
| Olig1 +30kb                | ChIP               | 5'- GAC AGA AAG CAA CCA AGC AG -3'      | 5'- CAA GGA GAA AGG CAC TGA CA -3'      |
| Olig1 -6,7kb               | ChIP               | 5'- TTG CAT TCT GCC TGT TCA AT -3'      | 5'- CTT GCT GGA TGT TCC AAA TG -3'      |
| Tulp3 +6kb                 | ChIP               | 5'- GTG TGA GCT GGA TTC TTC AG -3'      | 5'- GAC AGG AAA TGA CTC CTG GT -3'      |
| Klf15 +8,6kb               | ChIP               | 5'- CAG GGA GGT AAG AGG CCA TA -3'      | 5'- CTC CCA GGA AAG CAG AGA AC -3'      |
| Jag1 +6,5kb                | ChIP               | 5'- GAG TTG GCT GGA CTG ACT GA -3'      | 5'- ATC CTG AGA ATG TCC CGA GT -3'      |
